# Supplementary material for: Biomimetic polydopamine-laced hydroxyapatite collagen material orients osteoclast behavior to an anti-resorptive pattern without compromising osteoclasts’ coupling to osteoblasts
Source: Royal Society of Chemistry journal article supplement (doi:10.1039/d1bm01119g), 2021-01-01
Supplement: d1bm01119g1.pdf [file d1bm01119g1.pdf]

**Supplementary Table 1. Primer sequences used for RT-PCR**

| <b>Target gene</b> | <b>Forward sequence (5'-3')</b> | <b>Reverse sequence (5'-3')</b> |
|--------------------|---------------------------------|---------------------------------|
| <i>c-Fos</i>       | CGGGTTTCAACGCCGACTA             | TTGGCACTAGAGACGGACAGA           |
| <i>Nfatc1</i>      | GACCCGGAGTTCGACTTCG             | TGACACTAGGGGACACATAACTG         |
| <i>Trap</i>        | AGCAGCCAAGGAGGACTACGTT          | TCGTTGATGTCGCACAGAGG            |
| <i>Ctsk</i>        | AGGGAAGCAAGCACTGGATA            | GCTGGCTGGAATCACATCTT            |
| <i>Osx</i>         | CTCGTCTGACTGCCTGCCTAG           | GCGTGGATGCCTGCCTTGTA            |
| <i>Runx2</i>       | TTCAACGATCTGAGATTTGTGGG         | GGATGAGGAATGCGCCCTA             |
| <i>Bsp</i>         | AAAGTGAAGGAAAGCGACGA            | GTTCTTCTGCACCTGCTTC             |
| <i>Alpl</i>        | CCAACTCTTTTGCCAGAGA             | GGCTACATTGGTGTGAGCTTTT          |
| <i>Ocn</i>         | CCGGGAGCAGTGTGAGCTTA            | AGGCGGTCTTCAAGCCATACT           |
| <i>BMP6</i>        | AGAAGCGGGAGATGCAAAGG            | GACAGGGCGTTGTAGAGATCC           |
| <i>C3</i>          | CCAGCTCCCCATTAGCTCTG            | GCACTTGCCTCTTAGGAAGTC           |
| <i>Ctf1</i>        | CTCCTCAATCTCATTCTACCCC          | GCTGCACGTATTCTCCAGAA            |
| <i>Cthrc1</i>      | AAGCAAAAAGCGCTGATCC             | CCTGCTGGTCCTTGTAGACAC           |
| <i>Slit3</i>       | TGCCCCACCAAGTGTACCT             | GGCCAGCGAAGTCCATTTTG            |
| <i>Sphk1</i>       | GACTTTGTCCTGGTGCTGGT            | CCGCACGTACGTAGAACAGA            |
| <i>Wnt10b</i>      | GCGGGTCTCCTGTTCTTGG             | CCGGGAAGTTTAAGGCCAG             |
| <i>B2m</i>         | TTCTGGTGCTTGCTCACTGA            | CAGTATGTTGCGCTTCCCATT           |
